# Supplementary material
Source: MDPI journal article supplement (https://www.mdpi.com/2673-6772/1/2/10)
Supplement: s1 [file s1]

**Additional file 1: Table S1.** Oligonucleotides used for the molecular identification and/or characterization of *Giardia duodenalis*, *Cryptosporidium* spp., *Blastocystis* sp., and *Enterocytozoon bieneusi* in the present study.

| Target organism                | Locus    | Oligonucleotide | Sequence (5'–3')              | Reference |
|--------------------------------|----------|-----------------|-------------------------------|-----------|
| <i>Giardia duodenalis</i>      | ssu rRNA | Probe           | FAM-CCCGCGGCGGTCCCTGCTAG–BHQ1 | [40]      |
|                                |          | Gd-80F          | GACGGCTCAGGACAACGGTT          | [40]      |
|                                |          | Gd-127R         | TTGCCAGCGGTGTCCG              | [40]      |
|                                | gdh      | GDHeF           | TCAACGTYAAYCGYGGYTTCCGT       | [41]      |
|                                |          | GDHiF           | CAGTACACCTCYGCTCTCGG          | [41]      |
|                                |          | GDHiR           | GTTRTCCTTGACATCTCC            | [41]      |
|                                | bg       | G7_F            | AAGCCCGACGACCTACCCGCAGTGC     | [42]      |
|                                |          | G759_R          | GAGGCCGCCCTGGATCTTCGAGACGAC   | [42]      |
|                                |          | G99_F           | GAACGAACGAGATCGAGGTCCG        | [42]      |
|                                | tpi      | G609_R          | CTCGACGAGCTTCGTGTT            | [42]      |
|                                |          | AL3543_F        | AAATATGCCTGCTCGTCG            | [43]      |
|                                |          | AL3546_R        | CAAACCTTITCCGCAAACC           | [43]      |
|                                |          | AL3544_F        | CCCTTCATCGGIGGTAACCT          | [43]      |
|                                |          | AL3545_R        | GTGGCCACCACICCCGTGCC          | [43]      |
| <i>Cryptosporidium</i> spp.    | ssu rRNA | CR-P1           | CAGGGAGGTAGTGACAAGAA          | [44]      |
|                                |          | CR-P2           | TCAGCCTTGCGACCATACTC          | [44]      |
|                                |          | CR-P3           | ATTGGAGGGCAAGTCTGGTG          | [44]      |
|                                |          | CPB-DIAGR       | TAAGGTGCTGAAGGAGTAAGG         | [44]      |
|                                | gp60     | AL-3531         | ATAGTCTCCGCTGTATTC            | [45]      |
|                                |          | Al-3535         | GGAAGGAACGATGTATCT            | [45]      |
|                                |          | AL-3532         | TCCGCTGTATTCTCAGCC            | [45]      |
|                                |          | AL-3534         | GCAGAGGAACCAGCATC             | [45]      |
| <i>Blastocystis</i> sp.        | ssu rRNA | BhRDr           | GAGCTTTTTAACTGCAACAACG        | [46]      |
|                                |          | RD5             | ATCTGGTTGATCCTGCCAGT          | [46]      |
| <i>Enterocytozoon bieneusi</i> | ITS      | EBITS3_F        | GGTCATAGGGATGAAGAG            | [47]      |
|                                |          | EBITS4_R        | TTCGAGTTCTTTCGCGCTC           | [47]      |
|                                |          | EBITS1_F        | GCTCTGAATATCTATGGCT           | [47]      |
|                                |          | EBITS2.4_R      | ATCGCCGACGGATCCAAGTG          | [47]      |
